# Supplementary material for: The Effects of Resistance Exercise on Biomarkers of Breast Cancer Prognosis: A Pooled Analysis of Three Randomized Trials
Source: Oxford University Press journal article supplement (doi:10.1158/1055-9965.epi-17-0766), 2017-11-15
Supplement: 10559965epi170766-sup-188168_2_supp_4325802_3x33b5.docx [file 10559965epi170766-sup-188168_2_supp_4325802_3x33b5.docx]

Figure 1: CONSORT Diagram of samples for analysis

Figure 1 contains a CONSORT Diagram to map the flow of samples collected across the three RCT’s for pooled analyses.
