# Supplementary material for: The Effects of Resistance Exercise on Biomarkers of Breast Cancer Prognosis: A Pooled Analysis of Three Randomized Trials
Source: Oxford University Press journal article supplement (doi:10.1158/1055-9965.epi-17-0766), 2017-11-15
Supplement: 10559965epi170766-sup-188168_2_supp_4347921_1y1vkr.doc [file 10559965epi170766-sup-188168_2_supp_4347921_1y1vkr.doc]

Supplemental Figure 1

Allocation

**nths**

Baseline

**nths**

Mid-study

**nths**

End study

**nths**

Analysis

**nths**

Enrolled in parent trial (n=293)

Resistance Training

Provided blood sample (n=105)

Flexibility Training

Provided blood sample (n=104)

Consented for blood draw (n=215)

Resistance Training

Provided blood sample (n=83)

Flexibility Training

Provided blood sample (n=76)

Resistance Training

Provided blood sample (n=84)

Flexibility Training

Provided blood sample (n=78)

Resistance Training

Intent to treat analysis (n=109)

Flexibility Training

Intent to treat analysis (n=106)

Resistance Training (Intervention)

Allocated (n=109)

Flexibility Training (Control)

Allocated (n=106)
